# Supplementary material for: Increased Expression and Altered Cellular Localization of Fibroblast Growth Factor Receptor-Like 1 (FGFRL1) Are Associated with Prostate Cancer Progression
Source: MDPI journal article supplement (doi:10.3390/cancers14020278), 2022-01-07
Supplement: s1 [file s1]

## Supplementary Tables

### Increased expression and altered cellular localization of fibroblast growth factor receptor like 1 (FGFRL1) are associated with prostate cancer progression

Lan Yu, Mervi Toriseva<sup>†</sup>, Syeda Afshan<sup>†</sup>, Mario Cangiano, Vidal Fey, Andrew Erickson, Heikki Seikkula, Kalle Alanen, Pekka Taimen, Otto Ettala, Martti Nurmi, Peter J. Boström, Markku Kallajoki, Johanna Tuomela, Tuomas Mirtti, Inès Beumer, Matthias Nees, Pirkko Härkönen.

<sup>†</sup> These authors contributed equally to this work.

**Table S1:** Association of FGFRL1 IHC staining and clinico-pathological features of primary PCa in TMA I (n=139).

|                                | Membranous Staining |            |             |                | Cytoplasmic Staining |             |                | Nuclear Staining |             |                |
|--------------------------------|---------------------|------------|-------------|----------------|----------------------|-------------|----------------|------------------|-------------|----------------|
|                                | No. of patients (%) | FGFRL1 low | FGFRL1 high | <i>p</i> value | FGFRL1 low           | FGFRL1 high | <i>p</i> value | FGFRL1 low       | FGFRL1 high | <i>p</i> value |
| Age (years)                    |                     |            |             |                |                      |             |                |                  |             |                |
| < 65                           | 88(63)              | 45(51)     | 43(49)      | 0.668          | 45(51)               | 43(49)      | 0.643          | 58(66)           | 30(34)      | 0.570          |
| ≥ 65                           | 51(37)              | 28(55)     | 23(45)      |                | 24(47)               | 27(53)      |                | 36(71)           | 15(29)      |                |
| Gleason score                  |                     |            |             |                |                      |             |                |                  |             |                |
| ≤7                             | 117(84)             | 56(48)     | 61(52)      | <b>0.011</b>   | 60(51)               | 57(49)      | 0.372          | 86(74)           | 31(26)      | <b>0.001</b>   |
| 8-9                            | 22(16)              | 17(77)     | 5(23)       |                | 9(41)                | 13(59)      |                | 8(36)            | 22(64)      |                |
| pre-operative PSA (ng/ml)      |                     |            |             |                |                      |             |                |                  |             |                |
| <10                            | 87(63)              | 43(49)     | 44(51)      | 0.345          | 43(49)               | 44(51)      | 0.948          | 65(75)           | 22(25)      | <b>0.021</b>   |
| ≥10                            | 52(37)              | 30(58)     | 22(42)      |                | 26(50)               | 26(50)      |                | 29(56)           | 23(44)      |                |
| pT-category                    |                     |            |             |                |                      |             |                |                  |             |                |
| pT2a-T2c                       | 59(42)              | 30(51)     | 29(49)      | 0.735          | 28(47)               | 31(53)      | 0.658          | 44(75)           | 15(25)      | 0.133          |
| pT3a-T4                        | 80(58)              | 43(54)     | 37(46)      |                | 41(51)               | 39(49)      |                | 50(63)           | 30(37)      |                |
| Positive surgical margin (PSM) |                     |            |             |                |                      |             |                |                  |             |                |
| NO                             | 74(53)              | 39(53)     | 35(47)      | 0.963          | 38(51)               | 36(49)      | 0.667          | 56(76)           | 18(24)      | <b>0.030</b>   |
| YES                            | 65(47)              | 34(52)     | 31(48)      |                | 31(48)               | 34(52)      |                | 38(58)           | 27(42)      |                |

**Table S2:** Univariable and multivariable Cox regression analysis of FGFR1 staining and clinico-pathological parameters regarding to BCR-free survival in primary PCa, (n = 117, no neoadjuvant or adjuvant treatment)

|                                          | Univariate          |                   | Multivariate        |                   |
|------------------------------------------|---------------------|-------------------|---------------------|-------------------|
|                                          | HR (95%)            | P                 | HR (95%)            | P                 |
| FGFR1 plasma membrane (high vs. low)     | 1.721 (0.848-3.490) | 0.133             |                     |                   |
| FGFR1 cytoplasm (low vs. high)           | 1.797 (0.886-3.644) | 0.104             |                     |                   |
| FGFR1 nucleus (low vs. high)             | 3.486 (1.732-7.017) | <b>&lt;0.0001</b> | 3.535 (1.747-7.153) | <b>&lt;0.0001</b> |
| Age (<65 vs. ≥65)                        | 1.346 (0.668-2.709) | 0.406             |                     |                   |
| Preoperative PSA (<10ng/mL vs. ≥10ng/mL) | 1.140 (0.557-2.333) | 0.720             |                     |                   |
| Gleason score (≤7 vs. >8)                | 2.137 (0.923-4.946) | 0.076             | 2.186 (0.937-5.100) | 0.070             |
| pT-category (T2 vs. T3)                  | 1.388 (0.678-2.842) | 0.370             |                     |                   |
| Surgical margin (negative vs. positive)  | 0.867 (0.428-1.757) | 0.693             |                     |                   |

**Table S3A:** Genes significantly and reproducibly up-regulated in FGFR1-KD cells – xenografts and 2D monolayer cultures (corresponding to Venn diagram in Fig. 5C).

| ENSEMBL<br>GENE_ID | SYMBOL            | GENE NAME                                                                   | logFC<br>xenografts | p-value  | p-value<br>adjusted | logFC<br>cell line | p-value  | p-value<br>adjusted |
|--------------------|-------------------|-----------------------------------------------------------------------------|---------------------|----------|---------------------|--------------------|----------|---------------------|
| ENSG00000087495    | <b>PHACTR3</b>    | phosphatase and actin regulator 3                                           | <b>8.01</b>         | 5.14E-37 | 2.58E-34            | <b>8.73</b>        | 7.30E-06 | 3.15E-03            |
| ENSG00000160183    | <b>TMPRSS3</b>    | transmembrane protease, serine 3                                            | <b>11.53</b>        | 3.39E-37 | 1.81E-34            | <b>8.25</b>        | 9.06E-10 | 1.16E-05            |
| ENSG00000155760    | <b>FZD7</b>       | frizzled class receptor 7                                                   | <b>6.35</b>         | 1.76E-22 | 2.30E-20            | <b>5.77</b>        | 1.83E-08 | 5.09E-05            |
| ENSG00000160185    | <b>UBASH3A</b>    | ubiquitin associated and SH3 domain containing A                            | <b>5.95</b>         | 5.02E-07 | 5.75E-06            | <b>5.57</b>        | 6.59E-08 | 1.02E-04            |
| ENSG00000131398    | <b>KCNC3</b>      | potassium voltage-gated channel subfamily C member 3                        | <b>3.77</b>         | 4.81E-51 | 6.13E-48            | <b>5.49</b>        | 1.07E-05 | 3.79E-03            |
| ENSG00000198223    | <b>CSF2RA</b>     | colony stimulating factor 2 receptor alpha subunit                          | <b>6.58</b>         | 6.65E-13 | 2.33E-11            | <b>5.47</b>        | 8.12E-09 | 5.09E-05            |
| ENSG00000160182    | <b>TFF1</b>       | trefoil factor 1                                                            | <b>1.71</b>         | 1.09E-03 | 5.31E-03            | <b>5.46</b>        | 1.89E-07 | 2.19E-04            |
| ENSG00000071073    | <b>MGAT4A</b>     | mannosyl -glycoprotein beta-1,4-N-acetylglucosaminyl transferase, isozyme A | <b>7.91</b>         | 2.28E-31 | 6.59E-29            | <b>5.41</b>        | 3.30E-04 | 2.58E-02            |
| ENSG00000176788    | <b>BASP1</b>      | brain abundant membrane attached signal protein 1                           | <b>4.31</b>         | 1.13E-15 | 5.98E-14            | <b>5.32</b>        | 4.51E-06 | 2.22E-03            |
| ENSG00000077274    | <b>CAPN6</b>      | calpain 6                                                                   | <b>3.08</b>         | 5.35E-04 | 2.88E-03            | <b>5.29</b>        | 1.03E-07 | 1.32E-04            |
| ENSG00000177675    | <b>CD163L1</b>    | CD163 molecule like 1                                                       | <b>4.04</b>         | 7.07E-31 | 1.97E-28            | <b>5.27</b>        | 2.52E-06 | 1.70E-03            |
| ENSG00000186310    | <b>NAPIL3</b>     | nucleosome assembly protein 1 like 3                                        | <b>5.57</b>         | 7.62E-40 | 4.59E-37            | <b>4.64</b>        | 1.23E-04 | 1.59E-02            |
| ENSG00000126752    | <b>SSX1</b>       | SSX family member 1                                                         | <b>4.22</b>         | 5.04E-11 | 1.31E-09            | <b>4.62</b>        | 8.91E-06 | 3.56E-03            |
| ENSG00000148082    | <b>SHC3</b>       | SHC adaptor protein 3                                                       | <b>5.14</b>         | 4.16E-68 | 1.29E-64            | <b>4.54</b>        | 1.75E-06 | 1.40E-03            |
| ENSG00000179083    | <b>FAM133A</b>    | family with sequence similarity 133 member A                                | <b>4.11</b>         | 9.05E-33 | 3.07E-30            | <b>4.48</b>        | 1.29E-04 | 1.64E-02            |
| ENSG00000163347    | <b>CLDN1</b>      | claudin 1                                                                   | <b>3.33</b>         | 8.01E-26 | 1.35E-23            | <b>4.3</b>         | 1.21E-08 | 5.09E-05            |
| ENSG00000185973    | <b>TMLHE</b>      | trimethyllysine hydroxylase, epsilon                                        | <b>2.63</b>         | 3.86E-29 | 9.30E-27            | <b>4.25</b>        | 5.01E-05 | 9.49E-03            |
| ENSG00000237442    | <b>HNRNPA1P57</b> | HNRNPA1P57                                                                  | <b>1.74</b>         | 7.91E-04 | 4.05E-03            | <b>4.15</b>        | 3.19E-05 | 7.03E-03            |
| ENSG00000183287    | <b>CCBE1</b>      | collagen and calcium binding EGF domains 1                                  | <b>4.99</b>         | 3.93E-14 | 1.66E-12            | <b>4.03</b>        | 1.66E-04 | 1.86E-02            |
| ENSG00000078725    | <b>BRINP1</b>     | BMP/retinoic acid inducible neural specific 1                               | <b>5.64</b>         | 4.39E-12 | 1.35E-10            | <b>3.57</b>        | 5.99E-06 | 2.83E-03            |
| ENSG00000196220    | <b>SRGAP3</b>     | SLIT-ROBO Rho GTPase activating protein 3                                   | <b>3.14</b>         | 6.88E-24 | 1.03E-21            | <b>3.53</b>        | 1.32E-06 | 1.12E-03            |
| ENSG00000169083    | <b>AR</b>         | androgen receptor                                                           | <b>7.77</b>         | 2.45E-11 | 6.67E-10            | <b>3.45</b>        | 3.34E-05 | 7.24E-03            |
| ENSG00000155962    | <b>CLIC2</b>      | chloride intracellular channel 2                                            | <b>2.99</b>         | 4.84E-14 | 2.02E-12            | <b>3.21</b>        | 4.97E-05 | 9.49E-03            |
| ENSG00000125966    | <b>MMP24</b>      | matrix metalloproteinase 24                                                 | <b>1.7</b>          | 1.54E-04 | 9.74E-04            | <b>3.16</b>        | 7.94E-05 | 1.20E-02            |
| ENSG00000196611    | <b>MMP1</b>       | matrix metalloproteinase 1                                                  | <b>2.58</b>         | 1.43E-14 | 6.50E-13            | <b>3.05</b>        | 6.51E-04 | 3.81E-02            |
| ENSG00000163661    | <b>PTX3</b>       | pentraxin 3                                                                 | <b>5.55</b>         | 4.21E-24 | 6.47E-22            | <b>2.84</b>        | 1.16E-03 | 4.97E-02            |
| ENSG00000134193    | <b>REG4</b>       | regenerating family member 4                                                | <b>2.22</b>         | 3.65E-04 | 2.07E-03            | <b>2.47</b>        | 8.15E-05 | 1.20E-02            |
| ENSG00000198865    | <b>CCDC152</b>    | coiled-coil domain containing 152                                           | <b>3.51</b>         | 4.35E-10 | 9.50E-09            | <b>2.41</b>        | 2.42E-05 | 6.32E-03            |
| ENSG00000140297    | <b>GCNT3</b>      | glucosaminyl transferase 3, mucin type                                      | <b>2.2</b>          | 2.45E-10 | 5.54E-09            | <b>2.31</b>        | 4.49E-04 | 3.05E-02            |
| ENSG00000102271    | <b>KLHL4</b>      | kelch like family member 4                                                  | <b>2.71</b>         | 1.41E-21 | 1.57E-19            | <b>2.21</b>        | 9.20E-06 | 3.56E-03            |
| ENSG00000043355    | <b>ZIC2</b>       | Zic family member 2                                                         | <b>3.1</b>          | 2.20E-13 | 8.33E-12            | <b>2.18</b>        | 8.63E-04 | 4.36E-02            |

|                 |                   |                                                            |             |          |          |             |          |          |
|-----------------|-------------------|------------------------------------------------------------|-------------|----------|----------|-------------|----------|----------|
| ENSG00000139973 | <b>SYT16</b>      | synaptotagmin 16                                           | <b>1.64</b> | 1.03E-05 | 8.87E-05 | <b>2.18</b> | 7.40E-06 | 3.15E-03 |
| ENSG00000149573 | <b>MPZL2</b>      | myelin protein zero like 2                                 | <b>1.76</b> | 1.25E-15 | 6.59E-14 | <b>2.1</b>  | 9.23E-04 | 4.46E-02 |
| ENSG00000112299 | <b>VNN1</b>       | vanin 1                                                    | <b>3.89</b> | 5.11E-27 | 9.55E-25 | <b>1.92</b> | 8.13E-04 | 4.27E-02 |
| ENSG00000187323 | <b>DCC</b>        | DCC netrin 1 receptor                                      | <b>2.42</b> | 4.19E-27 | 7.97E-25 | <b>1.83</b> | 1.62E-04 | 1.85E-02 |
| ENSG00000131171 | <b>SH3BGRL</b>    | SH3 domain binding glutamate rich protein like             | <b>2.08</b> | 1.17E-51 | 1.69E-48 | <b>1.83</b> | 2.76E-05 | 6.69E-03 |
| ENSG00000188404 | <b>SELL</b>       | selectin L                                                 | <b>1.93</b> | 4.52E-07 | 5.23E-06 | <b>1.77</b> | 8.70E-04 | 4.36E-02 |
| ENSG00000176463 | <b>SLCO3A1</b>    | solute carrier organic anion transporter family member 3A1 | <b>2.41</b> | 4.61E-05 | 3.36E-04 | <b>1.68</b> | 1.55E-04 | 1.82E-02 |
| ENSG00000198157 | <b>HMGNS</b>      | high mobility group nucleosome binding domain 5            | <b>2.48</b> | 2.88E-44 | 2.50E-41 | <b>1.68</b> | 3.10E-04 | 2.53E-02 |
| ENSG00000043591 | <b>ADRB1</b>      | adrenoceptor beta 1                                        | <b>2.38</b> | 1.54E-39 | 9.06E-37 | <b>1.67</b> | 1.85E-04 | 2.00E-02 |
| ENSG00000169740 | <b>ZNF32</b>      | zinc finger protein 32                                     | <b>2.55</b> | 5.31E-39 | 3.03E-36 | <b>1.55</b> | 3.51E-04 | 2.67E-02 |
| ENSG00000120885 | <b>CLU</b>        | microRNA 6843                                              | <b>2.53</b> | 4.85E-40 | 3.00E-37 | <b>1.42</b> | 2.71E-05 | 6.69E-03 |
| ENSG00000087842 | <b>PIR</b>        | pirin                                                      | <b>2.49</b> | 5.23E-37 | 2.58E-34 | <b>1.41</b> | 8.68E-04 | 4.36E-02 |
| ENSG00000138829 | <b>FBN2</b>       | fibrillin 2                                                | <b>1.52</b> | 6.65E-21 | 6.71E-19 | <b>1.35</b> | 1.17E-03 | 4.97E-02 |
| ENSG00000147408 | <b>CSGALNACT1</b> | chondroitin sulfate N-acetyl-galactosaminyl-transferase 1  | <b>2.75</b> | 3.80E-40 | 2.42E-37 | <b>1.34</b> | 9.36E-05 | 1.33E-02 |
| ENSG00000197410 | <b>DCHS2</b>      | dachsous cadherin-related 2                                | <b>1.92</b> | 3.79E-03 | 1.55E-02 | <b>1.33</b> | 8.04E-04 | 4.24E-02 |
| ENSG00000178343 | <b>SHISA3</b>     | shisa family member 3                                      | <b>1.72</b> | 2.19E-20 | 2.11E-18 | <b>1.31</b> | 6.93E-08 | 1.02E-04 |
| ENSG00000081923 | <b>ATP8B1</b>     | ATPase phospholipid transporting 8B1                       | <b>2.56</b> | 1.94E-36 | 8.75E-34 | <b>1.28</b> | 1.92E-04 | 2.04E-02 |
| ENSG00000169760 | <b>NLGN1</b>      | neuroligin 1                                               | <b>1.82</b> | 1.32E-20 | 1.29E-18 | <b>1.15</b> | 4.89E-05 | 9.49E-03 |
| ENSG00000187764 | <b>SEMA4D</b>     | semaphorin 4D                                              | <b>2</b>    | 4.21E-06 | 3.96E-05 | <b>1.12</b> | 2.98E-04 | 2.53E-02 |
| ENSG00000168077 | <b>SCARA3</b>     | scavenger receptor class A member 3                        | <b>1.52</b> | 7.16E-25 | 1.15E-22 | <b>1</b>    | 5.75E-04 | 3.54E-02 |
| ENSG00000164733 | <b>CTSB</b>       | cathepsin B                                                | <b>1.59</b> | 6.49E-35 | 2.41E-32 | <b>0.86</b> | 9.60E-04 | 4.57E-02 |

**Table S3B:** Genes significantly and reproducibly down-regulated in FGFR1-KD cells – xenografts and 2D monolayer cultures, corresponding to Venn diagram shown in Fig. 5C.

| ENSEMBL<br>GENE_ID | SYMBOL          | GENE NAME                                                    | logFC<br>xenografts | p-value  | p-value<br>adjusted | logFC cell<br>line | p-value  | p-value<br>adjusted |
|--------------------|-----------------|--------------------------------------------------------------|---------------------|----------|---------------------|--------------------|----------|---------------------|
| ENSG00000166165    | <b>CKB</b>      | creatine kinase B                                            | <b>-1.56</b>        | 1.71E-19 | 1.50E-17            | <b>-0.97</b>       | 3.07E-05 | 6.87E-03            |
| ENSG00000124615    | <b>MOCS1</b>    | molybdenum cofactor<br>synthesis 1                           | <b>-2.23</b>        | 1.69E-14 | 7.54E-13            | <b>-1.16</b>       | 7.78E-04 | 4.19E-02            |
| ENSG00000142173    | <b>COL6A2</b>   | collagen type VI alpha 2<br>chain                            | <b>-2.01</b>        | 3.60E-36 | 1.53E-33            | <b>-1.67</b>       | 4.40E-04 | 3.02E-02            |
| ENSG00000181885    | <b>CLDN7</b>    | claudin 7                                                    | <b>-1.87</b>        | 4.60E-10 | 1.00E-08            | <b>-1.72</b>       | 5.65E-04 | 3.52E-02            |
| ENSG00000121653    | <b>MAPK8IP1</b> | mitogen-activated protein<br>kinase 8 interacting protein 1  | <b>-1.57</b>        | 7.89E-31 | 2.17E-28            | <b>-1.77</b>       | 4.79E-04 | 3.16E-02            |
| ENSG00000165186    | <b>PTCHD1</b>   | patched domain containing 1                                  | <b>-2.65</b>        | 1.87E-53 | 3.70E-50            | <b>-2</b>          | 4.37E-04 | 3.02E-02            |
| ENSG00000078114    | <b>NEBL</b>     | nebulin                                                      | <b>-1.84</b>        | 1.30E-25 | 2.18E-23            | <b>-2.03</b>       | 1.32E-05 | 4.27E-03            |
| ENSG00000184292    | <b>TACSTD2</b>  | tumor-associated calcium<br>signal transducer 2              | <b>-2.84</b>        | 2.42E-21 | 2.56E-19            | <b>-2.05</b>       | 3.37E-04 | 2.59E-02            |
| ENSG00000182389    | <b>CACNB4</b>   | calcium voltage-gated<br>channel auxiliary subunit beta<br>4 | <b>-3.07</b>        | 1.75E-05 | 1.42E-04            | <b>-2.47</b>       | 8.42E-06 | 3.47E-03            |
| ENSG00000141526    | <b>SLC16A3</b>  | Solute carrier 16 A 3                                        | <b>-1.71</b>        | 3.47E-40 | 2.28E-37            | <b>-2.48</b>       | 4.82E-04 | 3.16E-02            |
| ENSG00000150051    | <b>MXR</b>      | mohawk homeobox                                              | <b>-2.56</b>        | 1.35E-36 | 6.35E-34            | <b>-2.62</b>       | 5.24E-05 | 9.71E-03            |
| ENSG00000157833    | <b>GAREM2</b>   | GRB2 associated regulator of<br>MAPK1 subtype 2              | <b>-2.25</b>        | 6.42E-16 | 3.51E-14            | <b>-2.74</b>       | 6.34E-04 | 3.77E-02            |
| ENSG00000116016    | <b>EPAS1</b>    | endothelial PAS domain<br>protein 1                          | <b>-4.4</b>         | 5.03E-24 | 7.63E-22            | <b>-2.97</b>       | 2.41E-04 | 2.29E-02            |
| ENSG00000012171    | <b>SEMA3B</b>   | microRNA 6872                                                | <b>-1.57</b>        | 3.06E-15 | 1.50E-13            | <b>-3.03</b>       | 5.14E-04 | 3.31E-02            |
| ENSG00000120784    | <b>ZFP30</b>    | ZFP30 zinc finger protein                                    | <b>-8.96</b>        | 1.37E-21 | 1.55E-19            | <b>-4.85</b>       | 7.97E-05 | 1.20E-02            |
| ENSG00000198538    | <b>ZNF28</b>    | zinc finger protein 28                                       | <b>-3.5</b>         | 4.05E-07 | 4.74E-06            | <b>-4.89</b>       | 6.43E-04 | 3.78E-02            |
| ENSG00000244219    | <b>TMEM225B</b> | TMEM225B                                                     | <b>-8.05</b>        | 4.10E-17 | 2.69E-15            | <b>-6.01</b>       | 1.06E-05 | 3.79E-03            |
| ENSG00000203995    | <b>ZYG11A</b>   | zyg-11 family member A, cell<br>cycle regulator              | <b>-8.88</b>        | 9.29E-21 | 9.28E-19            | <b>-6.22</b>       | 1.20E-05 | 4.13E-03            |
| ENSG00000179542    | <b>SLITRK4</b>  | SLIT and NTRK like family<br>member 4                        | <b>-7.31</b>        | 1.50E-28 | 3.36E-26            | <b>-7.21</b>       | 7.68E-04 | 4.16E-02            |

**Table S4A:** Top 100 most prominently up-regulated genes in mouse xenograft tumors after stable knock-down of FGFR1.

| SYMBOL          | ENSEMBL_GENE_ID | Gene Name (ENSEMBL)                                                      | log2 Fold Change | p-value adjusted |
|-----------------|-----------------|--------------------------------------------------------------------------|------------------|------------------|
| <b>TMPRSS3</b>  | ENSG00000160183 | transmembrane serine protease 3                                          | <b>11.53</b>     | 1.81E-30         |
| <b>CNNM1</b>    | ENSG00000119946 | cyclin and CBS domain divalent metal cation transport mediator 1         | <b>10.51</b>     | 3.73E-23         |
| <b>ATF7IP2</b>  | ENSG00000166669 | activating transcription factor 7 interacting protein 2                  | <b>9.56</b>      | 4.68E-19         |
| <b>MAGEB16</b>  | ENSG00000189023 | MAGE family member B16                                                   | <b>9.56</b>      | 2.76E-17         |
| <b>BMP7</b>     | ENSG00000101144 | bone morphogenetic protein 7                                             | <b>9.02</b>      | 3.19E-17         |
| <b>PDPN</b>     | ENSG00000162493 | podoplanin                                                               | <b>8.80</b>      | 2.27E-12         |
| <b>NCAM1</b>    | ENSG00000149294 | neural cell adhesion molecule 1                                          | <b>8.34</b>      | 1.75E-03         |
| <b>FAM155B</b>  | ENSG00000130054 | family with sequence similarity 155 B                                    | <b>8.19</b>      | 4.71E-08         |
| <b>ZNF536</b>   | ENSG00000198597 | zinc finger protein 536                                                  | <b>8.18</b>      | 1.91E+01         |
| <b>LRP3</b>     | ENSG00000130881 | LDL receptor related protein 3                                           | <b>8.14</b>      | 6.87E-10         |
| <b>PHACTR3</b>  | ENSG00000087495 | phosphatase and actin regulator 3                                        | <b>8.01</b>      | 2.58E-30         |
| <b>LARGE1</b>   | ENSG00000133424 | LARGE xylosyl- and glucuronyltransfer. 1                                 | <b>8.00</b>      | 7.06E-01         |
| <b>SLFN11</b>   | ENSG00000172716 | schlafen family member 11                                                | <b>7.92</b>      | 4.91E+01         |
| <b>MGAT4A</b>   | ENSG00000071073 | alpha-1,3-mannosyl-glycoprotein 4-beta-N-acetylglucosaminyltransferase A | <b>7.91</b>      | 6.59E-25         |
| <b>TBX5-AS1</b> | ENSG00000255399 | TBX5 antisense RNA 1                                                     | <b>7.82</b>      | 2.75E+01         |
| <b>GOLGA8G</b>  | ENSG00000183629 | golgin A8 family member G                                                | <b>7.79</b>      | 1.41E-08         |
| <b>ANKRD30B</b> | ENSG00000180777 | ankyrin repeat domain 30B                                                | <b>7.79</b>      | 3.66E-03         |
| <b>FGF23</b>    | ENSG00000118972 | fibroblast growth factor 23                                              | <b>7.77</b>      | 3.55E-07         |
| <b>AR</b>       | ENSG00000169083 | androgen receptor                                                        | <b>7.77</b>      | 6.67E-06         |
| <b>COL22A1</b>  | ENSG00000169436 | collagen type XXII alpha 1 chain                                         | <b>7.68</b>      | 5.21E-02         |
| <b>CRMP1</b>    | ENSG00000072832 | collapsin response mediator protein 1                                    | <b>7.67</b>      | 8.35E-01         |
| <b>DLGAP2</b>   | ENSG00000198010 | DLG associated protein 2                                                 | <b>7.64</b>      | 2.13E-01         |
| <b>TIMP3</b>    | ENSG00000100234 | TIMP metalloproteinase inhibitor 3                                       | <b>7.60</b>      | 1.52E+00         |
| <b>LPL</b>      | ENSG00000175445 | lipoprotein lipase                                                       | <b>7.52</b>      | 2.10E-01         |
| <b>FOXF1</b>    | ENSG00000103241 | forkhead box F1                                                          | <b>7.42</b>      | 4.47E-05         |
| <b>CXADRP3</b>  | ENSG00000265766 | CXADR pseudogene 3                                                       | <b>7.42</b>      | 1.27E+02         |
| <b>PPP1R14C</b> | ENSG00000198729 | protein phosphatase 1 regulatory inhibitor subunit 14C                   | <b>7.29</b>      | 2.31E-05         |
| <b>LRIG1</b>    | ENSG00000144749 | leucine rich repeats and immunoglobulin like domains 1                   | <b>7.17</b>      | 2.07E-11         |
| <b>TBX5</b>     | ENSG00000089225 | T-box transcription factor 5                                             | <b>7.06</b>      | 4.15E+00         |
| <b>ROR2</b>     | ENSG00000169071 | receptor tyrosine kinase like orphan rec. 2                              | <b>6.96</b>      | 1.25E-01         |
| <b>GABRA5</b>   | ENSG00000186297 | gamma-aminobutyric acid type A receptor alpha5 subunit                   | <b>6.96</b>      | 1.99E-02         |

|                     |                 |                                                              |             |          |
|---------------------|-----------------|--------------------------------------------------------------|-------------|----------|
| <b>CLRN3</b>        | ENSG00000180745 | clarin 3                                                     | <b>6.95</b> | 8.03E+00 |
| <b>NDRG2</b>        | ENSG00000165795 | NDRG family member 2                                         | <b>6.92</b> | 1.44E+01 |
| <b>WNT3A</b>        | ENSG00000154342 | Wnt family member 3A                                         | <b>6.89</b> | 1.41E+01 |
| <b>OR10J3</b>       | ENSG00000196266 | olfactory receptor family 10 subfamily J member 3            | <b>6.89</b> | 6.97E-05 |
| <b>LINC00993</b>    | ENSG00000235687 | long intergenic non-protein coding RNA 993                   | <b>6.86</b> | 2.10E-04 |
| <b>FAM189A1</b>     | ENSG00000104059 | family with sequence similarity 189 member A1                | <b>6.84</b> | 2.34E+00 |
| <b>CECR2</b>        | ENSG00000099954 | CECR2 histone acetyl-lysine reader                           | <b>6.79</b> | 1.73E+01 |
| <b>TMEM132D-AS1</b> | ENSG00000249196 | TMEM132D antisense RNA 1                                     | <b>6.78</b> | 5.14E-03 |
| <b>TSHZ2</b>        | ENSG00000182463 | teashirt zinc finger homeobox 2                              | <b>6.72</b> | 2.68E-04 |
| <b>EMP2</b>         | ENSG00000213853 | epithelial membrane protein 2                                | <b>6.61</b> | 3.12E-43 |
| <b>CSF2RA</b>       | ENSG00000198223 | colony stimulating factor 2 receptor alpha subunit           | <b>6.58</b> | 2.33E-07 |
| <b>LITAF</b>        | ENSG00000189067 | lipopolysaccharide induced TNF factor                        | <b>6.57</b> | 2.29E-03 |
| <b>TFAP2C</b>       | ENSG00000087510 | transcription factor AP-2 gamma                              | <b>6.56</b> | 4.60E-03 |
| <b>CHST15</b>       | ENSG00000182022 | carbohydrate sulfotransferase 15                             | <b>6.56</b> | 1.60E-03 |
| <b>LDLRAD4</b>      | ENSG00000168675 | low density lipoprotein receptor class A domain containing 4 | <b>6.55</b> | 2.69E-03 |
| <b>CRNDE</b>        | ENSG00000245694 | colorectal neoplasia differentially expressed                | <b>6.54</b> | 4.10E-11 |
| <b>IRX5</b>         | ENSG00000176842 | iroquois homeobox 5                                          | <b>6.53</b> | 3.73E-05 |
| <b>SYT8</b>         | ENSG00000149043 | synaptotagmin 8                                              | <b>6.51</b> | 9.75E+00 |
| <b>MAGEA5</b>       | ENSG00000242520 | MAGE family member A5                                        | <b>6.49</b> | 5.75E-05 |
| <b>IRX4</b>         | ENSG00000113430 | iroquois homeobox 4                                          | <b>6.48</b> | 5.78E-03 |
| <b>TMC3-AS1</b>     | ENSG00000259343 | TMC3 antisense RNA 1                                         | <b>6.43</b> | 2.49E-04 |
| <b>ADARB2</b>       | ENSG00000185736 | adenosine deaminase RNA specific B2 (inactive)               | <b>6.41</b> | 5.79E-02 |
| <b>ATRNL1</b>       | ENSG00000107518 | attractin like 1                                             | <b>6.37</b> | 2.25E-16 |
| <b>FZD7</b>         | ENSG00000155760 | frizzled class receptor 7                                    | <b>6.35</b> | 2.30E-16 |
| <b>MYO18B</b>       | ENSG00000133454 | myosin XVIIIIB                                               | <b>6.35</b> | 3.43E-01 |
| <b>FAM20C</b>       | ENSG00000177706 | FAM20C golgi associated secretory pathway kinase             | <b>6.34</b> | 7.01E-01 |
| <b>LPAR4</b>        | ENSG00000147145 | lysophosphatidic acid receptor 4                             | <b>6.26</b> | 7.82E-07 |
| <b>DIRAS2</b>       | ENSG00000165023 | DIRAS family GTPase 2                                        | <b>6.25</b> | 2.57E-03 |
| <b>EZH1</b>         | ENSG00000187690 | EZH inhibitory protein                                       | <b>6.25</b> | 2.21E-02 |
| <b>SNTG2</b>        | ENSG00000172554 | syntrophin gamma 2                                           | <b>6.23</b> | 1.02E-02 |
| <b>MAN1C1</b>       | ENSG00000117643 | mannosidase alpha class 1C member 1                          | <b>6.22</b> | 3.70E-03 |
| <b>LRRC38</b>       | ENSG00000162494 | leucine rich repeat containing 38                            | <b>6.20</b> | 1.89E-01 |
| <b>ADGRE1</b>       | ENSG00000174837 | adhesion G protein-coupled receptor E1                       | <b>6.19</b> | 5.84E-16 |
| <b>XKR3</b>         | ENSG00000172967 | XK related 3                                                 | <b>6.17</b> | 3.31E-04 |
| <b>TPO</b>          | ENSG00000115705 | thyroid peroxidase                                           | <b>6.14</b> | 3.16E-01 |
| <b>ADAMTS16</b>     | ENSG00000145536 | ADAM metalloproteinase with thrombospondin type 1 motif 16   | <b>6.12</b> | 2.28E-01 |

|                  |                 |                                                          |             |          |
|------------------|-----------------|----------------------------------------------------------|-------------|----------|
| <b>H19</b>       | ENSG00000130600 | H19 imprinted maternally expressed transcript            | <b>6.11</b> | 2.33E-07 |
| <b>CRYZL2P</b>   | ENSG00000242193 | crystallin zeta like 2, pseudogene                       | <b>6.10</b> | 3.15E-02 |
| <b>EMX1</b>      | ENSG00000135638 | empty spiracles homeobox 1                               | <b>6.08</b> | 2.28E+02 |
| <b>SDK1</b>      | ENSG00000146555 | sidekick cell adhesion molecule 1                        | <b>6.07</b> | 4.80E+00 |
| <b>KAZN</b>      | ENSG00000189337 | kazrin, periplakin interacting protein                   | <b>6.02</b> | 3.52E-01 |
| <b>MNX1-AS1</b>  | ENSG00000243479 | MNX1 antisense RNA 1 (head to head)                      | <b>6.02</b> | 3.82E-14 |
| <b>LILRA2</b>    | ENSG00000239998 | leukocyte immunoglobulin like receptor A2                | <b>5.98</b> | 2.53E-01 |
| <b>UBASH3A</b>   | ENSG00000160185 | ubiquitin associated and SH3 domain containing A         | <b>5.95</b> | 5.75E-02 |
| <b>RIMKLB</b>    | ENSG00000166532 | ribosomal modification protein rimK like family member B | <b>5.90</b> | 2.39E-01 |
| <b>TRIM22</b>    | ENSG00000132274 | tripartite motif containing 22                           | <b>5.88</b> | 3.31E-02 |
| <b>SHANK2</b>    | ENSG00000162105 | SH3 and multiple ankyrin repeat domains 2                | <b>5.88</b> | 1.03E+02 |
| <b>FOXI1</b>     | ENSG00000168269 | forkhead box I1                                          | <b>5.87</b> | 1.34E+01 |
| <b>LINC02152</b> | ENSG00000261319 | long intergenic non-protein coding RNA 2152              | <b>5.86</b> | 5.66E-01 |
| <b>TESC</b>      | ENSG00000088992 | tescalcin                                                | <b>5.85</b> | 4.87E-01 |
| <b>GAS7</b>      | ENSG00000007237 | growth arrest specific 7                                 | <b>5.84</b> | 4.28E+02 |
| <b>LINC01257</b> | ENSG00000204603 | long intergenic non-protein coding RNA 1257              | <b>5.83</b> | 1.80E+00 |
| <b>ERO1B</b>     | ENSG00000086619 | endoplasmic reticulum oxidoreductase 1 beta              | <b>5.78</b> | 5.29E-20 |
| <b>CYTL1</b>     | ENSG00000170891 | cytokine like 1                                          | <b>5.78</b> | 1.30E+00 |
| <b>C7orf33</b>   | ENSG00000170279 | chromosome 7 open reading frame 33                       | <b>5.77</b> | 1.88E+00 |
| <b>THBS2</b>     | ENSG00000186340 | thrombospondin 2                                         | <b>5.71</b> | 1.80E-09 |
| <b>ZNF516</b>    | ENSG00000101493 | zinc finger protein 516                                  | <b>5.70</b> | 5.07E-06 |
| <b>LINC01484</b> | ENSG00000253686 | long intergenic non-protein coding RNA 1484              | <b>5.70</b> | 6.00E-02 |
| <b>BRINP1</b>    | ENSG00000078725 | BMP/retinoic acid inducible neural specific 1            | <b>5.64</b> | 1.35E-06 |
| <b>PIEZO2</b>    | ENSG00000154864 | piezo type mechanosensitive ion channel component 2      | <b>5.61</b> | 1.62E-01 |
| <b>ZNF157</b>    | ENSG00000147117 | zinc finger protein 157                                  | <b>5.57</b> | 6.19E+00 |
| <b>NKD1</b>      | ENSG00000140807 | NKD inhibitor of WNT signaling pathway 1                 | <b>5.57</b> | 6.60E-01 |
| <b>NAP1L3</b>    | ENSG00000186310 | nucleosome assembly protein 1 like 3                     | <b>5.57</b> | 4.59E-33 |
| <b>EYA2</b>      | ENSG00000064655 | EYA transcriptional coactivator and phosphatase 2        | <b>5.56</b> | 2.92E-02 |
| <b>ZMAT1</b>     | ENSG00000166432 | zinc finger matrin-type 1                                | <b>5.55</b> | 5.18E-11 |
| <b>ZNF423</b>    | ENSG00000102935 | zinc finger protein 423                                  | <b>5.55</b> | 5.86E-05 |

|                |                 |                               |             |          |
|----------------|-----------------|-------------------------------|-------------|----------|
| <b>PTX3</b>    | ENSG00000163661 | pentraxin 3                   | <b>5.55</b> | 6.47E-18 |
| <b>SPATA48</b> | ENSG00000164500 | spermatogenesis associated 48 | <b>5.55</b> | 3.75E+00 |
| <b>SDC2</b>    | ENSG00000169439 | syndecan 2                    | <b>5.54</b> | 4.83E-01 |

**Table S4B:** Top 100 most prominently down-regulated genes in mouse xenograft tumors after stable knock-down of FGFR1.

| <b>SYMBOL</b>      | <b>ENSEMBL_GENE_ID</b> | <b>Gene Name (ENSEMBL)</b>                                               | <b>log2 Fold Change</b> | <b>p-value adjusted</b> |
|--------------------|------------------------|--------------------------------------------------------------------------|-------------------------|-------------------------|
| <b>TMEM168</b>     | ENSG00000146802        | transmembrane protein 168                                                | <b>-10.90</b>           | 8.10E-26                |
| <b>ZFP30</b>       | ENSG00000120784        | ZFP30 zinc finger protein                                                | <b>-8.96</b>            | 1.55E-15                |
| <b>ZYG11A</b>      | ENSG00000203995        | zyg-11 family member A, cell cycle regulator                             | <b>-8.88</b>            | 9.28E-15                |
| <b>SMO</b>         | ENSG00000128602        | smoothened, frizzled class receptor                                      | <b>-8.31</b>            | 1.89E-35                |
| <b>MIR548XH</b>    | ENSG00000224141        | MIR548X host gene                                                        | <b>-8.10</b>            | 6.51E-11                |
| <b>TMEM225B</b>    | ENSG00000244219        | transmembrane protein 225B                                               | <b>-8.05</b>            | 2.69E-11                |
| <b>SERPINB9</b>    | ENSG00000170542        | serpin family B member 9                                                 | <b>-7.88</b>            | 4.03E-10                |
| <b>ZSCAN18</b>     | ENSG00000121413        | zinc finger and SCAN domain containing 18                                | <b>-7.83</b>            | 3.44E-13                |
| <b>SLITRK4</b>     | ENSG00000179542        | SLIT and NTRK like family member 4                                       | <b>-7.31</b>            | 3.36E-22                |
| <b>PTGS2</b>       | ENSG00000073756        | prostaglandin-endoperoxide synthase 2                                    | <b>-6.81</b>            | 5.65E-06                |
| <b>SLC26A4-AS1</b> | ENSG00000233705        | SLC26A4 antisense RNA 1                                                  | <b>-6.30</b>            | 1.29E-03                |
| <b>PPDPFL</b>      | ENSG00000168333        | pancreatic progenitor cell differentiation and proliferation factor like | <b>-6.19</b>            | 4.44E-14                |
| <b>CXCL1</b>       | ENSG00000163739        | C-X-C motif chemokine ligand 1                                           | <b>-6.19</b>            | 3.87E-03                |
| <b>CLDN10-AS1</b>  | ENSG00000223392        | CLDN10 antisense RNA 1                                                   | <b>-6.14</b>            | 3.77E-04                |
| <b>RAB6B</b>       | ENSG00000154917        | RAB6B, member RAS oncogene family                                        | <b>-6.14</b>            | 1.41E-65                |
| <b>DNAJC15</b>     | ENSG00000120675        | DnaJ heat shock protein family (Hsp40) member C15                        | <b>-5.93</b>            | 9.72E-05                |
| <b>CD79B</b>       | ENSG00000007312        | CD79b molecule                                                           | <b>-5.86</b>            | 1.16E-02                |
| <b>ZNF347</b>      | ENSG00000197937        | zinc finger protein 347                                                  | <b>-5.75</b>            | 6.91E-02                |
| <b>IL1RAPL1</b>    | ENSG00000169306        | interleukin 1 receptor accessory protein like 1                          | <b>-5.72</b>            | 1.08E-02                |
| <b>ENG</b>         | ENSG00000106991        | endoglin                                                                 | <b>-5.70</b>            | 8.47E-02                |
| <b>LINC02820</b>   | ENSG00000258815        | long intergenic non-protein coding RNA 2820                              | <b>-5.63</b>            | 2.16E-01                |
| <b>KCNH5</b>       | ENSG00000140015        | potassium voltage-gated channel subfamily H member 5                     | <b>-5.54</b>            | 3.39E+00                |
| <b>LAG3</b>        | ENSG00000089692        | lymphocyte activating 3                                                  | <b>-5.51</b>            | 1.78E-159               |
| <b>ZNF607</b>      | ENSG00000198182        | zinc finger protein 607                                                  | <b>-5.44</b>            | 1.97E-03                |
| <b>SLC10A4</b>     | ENSG00000145248        | solute carrier family 10 member 4                                        | <b>-5.36</b>            | 5.74E+00                |
| <b>BCL2A1</b>      | ENSG00000140379        | BCL2 related protein A1                                                  | <b>-5.12</b>            | 1.36E+01                |

|                  |                 |                                                     |              |          |
|------------------|-----------------|-----------------------------------------------------|--------------|----------|
| <b>ZNF256</b>    | ENSG00000152454 | zinc finger protein 256                             | <b>-5.09</b> | 1.63E-15 |
| <b>RPS6KL1</b>   | ENSG00000198208 | ribosomal protein S6 kinase like 1                  | <b>-5.05</b> | 1.89E+00 |
| <b>FGG</b>       | ENSG00000171557 | fibrinogen gamma chain                              | <b>-4.87</b> | 3.34E+01 |
| <b>IGFBP3</b>    | ENSG00000146674 | insulin like growth factor binding protein 3        | <b>-4.85</b> | 7.80E-20 |
| <b>OTOGL</b>     | ENSG00000165899 | otogelin like                                       | <b>-4.84</b> | 7.24E-05 |
| <b>CDH5</b>      | ENSG00000179776 | cadherin 5                                          | <b>-4.84</b> | 1.54E+01 |
| <b>LINC01357</b> | ENSG00000224167 | long intergenic non-protein coding RNA 1357         | <b>-4.81</b> | 1.20E-09 |
| <b>TMPRSS15</b>  | ENSG00000154646 | transmembrane serine protease 15                    | <b>-4.73</b> | 2.01E-18 |
| <b>XIST</b>      | ENSG00000229807 | X inactive specific transcript                      | <b>-4.71</b> | 6.74E+00 |
| <b>C6orf223</b>  | ENSG00000181577 | chromosome 6 open reading frame 223                 | <b>-4.70</b> | 2.89E-03 |
| <b>DAAM2</b>     | ENSG00000146122 | dishevelled associated activator of morphogenesis 2 | <b>-4.64</b> | 4.10E+01 |
| <b>MT1M</b>      | ENSG00000205364 | metallothionein 1M                                  | <b>-4.62</b> | 1.09E+02 |
| <b>OGN</b>       | ENSG00000106809 | osteoglycin                                         | <b>-4.57</b> | 8.01E-02 |
| <b>CDC42P2</b>   | ENSG00000234844 | cell division cycle 42 pseudogene 2                 | <b>-4.57</b> | 1.69E+01 |
| <b>SYN1</b>      | ENSG00000008056 | synapsin I                                          | <b>-4.48</b> | 2.40E+01 |
| <b>HPN</b>       | ENSG00000105707 | hepsin                                              | <b>-4.46</b> | 1.25E-01 |
| <b>UGT2B10</b>   | ENSG00000109181 | UDP glucuronosyltransferase family 2 member B10     | <b>-4.41</b> | 2.63E-01 |
| <b>PRG4</b>      | ENSG00000116690 | proteoglycan 4                                      | <b>-4.40</b> | 1.75E-03 |
| <b>EPAS1</b>     | ENSG00000116016 | endothelial PAS domain protein 1                    | <b>-4.40</b> | 7.63E-18 |
| <b>NXF3</b>      | ENSG00000147206 | nuclear RNA export factor 3                         | <b>-4.36</b> | 2.54E-02 |
| <b>TNFSF14</b>   | ENSG00000125735 | TNF superfamily member 14                           | <b>-4.35</b> | 2.89E+00 |
| <b>SCNN1G</b>    | ENSG00000166828 | sodium channel epithelial 1 gamma subunit           | <b>-4.35</b> | 1.66E-13 |
| <b>LRRK2</b>     | ENSG00000188906 | leucine rich repeat kinase 2                        | <b>-4.34</b> | 1.25E-03 |
| <b>ACSL5</b>     | ENSG00000197142 | acyl-CoA synthetase long chain family member 5      | <b>-4.33</b> | 1.70E-05 |
| <b>CYP2C18</b>   | ENSG00000108242 | cytochrome P450 family 2 subfamily C member 18      | <b>-4.32</b> | 1.30E+02 |
| <b>TREM1</b>     | ENSG00000124731 | triggering receptor expressed on myeloid cells 1    | <b>-4.31</b> | 7.07E-04 |
| <b>AQP1</b>      | ENSG00000240583 | aquaporin 1 (Colton blood group)                    | <b>-4.26</b> | 2.86E-13 |
| <b>EVI2A</b>     | ENSG00000126860 | ecotropic viral integration site 2A                 | <b>-4.26</b> | 4.47E+01 |
| <b>PDZK1IP1</b>  | ENSG00000162366 | PDZK1 interacting protein 1                         | <b>-4.24</b> | 2.18E+01 |
| <b>SLC35G2</b>   | ENSG00000168917 | solute carrier family 35 member G2                  | <b>-4.21</b> | 1.85E-25 |
| <b>CDH13</b>     | ENSG00000140945 | cadherin 13                                         | <b>-4.12</b> | 6.42E-04 |
| <b>TGM2</b>      | ENSG00000198959 | transglutaminase 2                                  | <b>-4.11</b> | 6.17E-05 |
| <b>SCNN1B</b>    | ENSG00000168447 | sodium channel epithelial 1 beta subunit            | <b>-4.11</b> | 2.10E-05 |

|                  |                 |                                                       |              |          |
|------------------|-----------------|-------------------------------------------------------|--------------|----------|
| <b>DENND2D</b>   | ENSG00000162777 | DENN domain containing 2D                             | <b>-4.09</b> | 6.00E-53 |
| <b>VWA1</b>      | ENSG00000179403 | von Willebrand factor A domain containing 1           | <b>-4.07</b> | 2.54E-02 |
| <b>GJB4</b>      | ENSG00000189433 | gap junction protein beta 4                           | <b>-4.02</b> | 8.94E+01 |
| <b>PDE8B</b>     | ENSG00000113231 | phosphodiesterase 8B                                  | <b>-3.99</b> | 1.95E-15 |
| <b>RSPO2</b>     | ENSG00000147655 | R-spondin 2                                           | <b>-3.98</b> | 3.08E+02 |
| <b>ACKR3</b>     | ENSG00000144476 | atypical chemokine receptor 3                         | <b>-3.95</b> | 2.11E-11 |
| <b>CSF2</b>      | ENSG00000164400 | colony stimulating factor 2                           | <b>-3.94</b> | 7.82E+00 |
| <b>SIRPG-AS1</b> | ENSG00000237914 | SIRPG antisense RNA 1                                 | <b>-3.93</b> | 3.22E+02 |
| <b>LINC01714</b> | ENSG00000227634 | long intergenic non-protein coding RNA 1714           | <b>-3.92</b> | 2.56E+02 |
| <b>ANKRD60</b>   | ENSG00000124227 | ankyrin repeat domain 60                              | <b>-3.86</b> | 7.11E-06 |
| <b>NDUFA4L2</b>  | ENSG00000185633 | NDUFA4 mitochondrial complex associated like 2        | <b>-3.85</b> | 3.05E-06 |
| <b>HHLA2</b>     | ENSG00000114455 | HERV-H LTR-associating 2                              | <b>-3.85</b> | 2.09E-01 |
| <b>AGTR1</b>     | ENSG00000144891 | angiotensin II receptor type 1                        | <b>-3.84</b> | 6.87E+01 |
| <b>LGI2</b>      | ENSG00000153012 | leucine rich repeat LGI family member 2               | <b>-3.83</b> | 1.80E-11 |
| <b>GFAP</b>      | ENSG00000131095 | glial fibrillary acidic protein                       | <b>-3.71</b> | 3.05E+02 |
| <b>ELOVL3</b>    | ENSG00000119915 | ELOVL fatty acid elongase 3                           | <b>-3.69</b> | 2.89E+02 |
| <b>C6orf132</b>  | ENSG00000188112 | chromosome 6 open reading frame 132                   | <b>-3.68</b> | 1.34E-02 |
| <b>ASB14</b>     | ENSG00000239388 | ankyrin repeat and SOCS box containing 14             | <b>-3.67</b> | 3.46E+02 |
| <b>RTL4</b>      | ENSG00000187823 | retrotransposon Gag like 4                            | <b>-3.65</b> | 2.32E-02 |
| <b>CLDN24</b>    | ENSG00000185758 | claudin 24                                            | <b>-3.64</b> | 5.84E-02 |
| <b>P4HA3-AS1</b> | ENSG00000246211 | P4HA3 antisense RNA 1                                 | <b>-3.62</b> | 3.99E+02 |
| <b>FGB</b>       | ENSG00000171564 | fibrinogen beta chain                                 | <b>-3.60</b> | 1.26E+01 |
| <b>ZNF518A</b>   | ENSG00000177853 | zinc finger protein 518A                              | <b>-3.59</b> | 3.24E+02 |
| <b>CD86</b>      | ENSG00000114013 | CD86 molecule                                         | <b>-3.59</b> | 9.20E-02 |
| <b>OASL</b>      | ENSG00000135114 | 2'-5'-oligoadenylate synthetase like                  | <b>-3.57</b> | 1.48E-11 |
| <b>CSPG4</b>     | ENSG00000173546 | chondroitin sulfate proteoglycan 4                    | <b>-3.56</b> | 1.47E+01 |
| <b>SCGB1D2</b>   | ENSG00000124935 | secretoglobin family 1D member 2                      | <b>-3.56</b> | 4.53E+02 |
| <b>FAM225A</b>   | ENSG00000231528 | family with sequence similarity 225 member A          | <b>-3.56</b> | 1.83E+01 |
| <b>PLA2G3</b>    | ENSG00000100078 | phospholipase A2 group III                            | <b>-3.55</b> | 9.34E+00 |
| <b>ANO3</b>      | ENSG00000134343 | anoctamin 3                                           | <b>-3.55</b> | 7.61E+00 |
| <b>CPA5</b>      | ENSG00000158525 | carboxypeptidase A5                                   | <b>-3.50</b> | 2.16E+02 |
| <b>ZNF28</b>     | ENSG00000198538 | zinc finger protein 28                                | <b>-3.50</b> | 4.74E-02 |
| <b>LINC01356</b> | ENSG00000215866 | long intergenic non-protein coding RNA 1356           | <b>-3.49</b> | 2.43E+00 |
| <b>KCNJ15</b>    | ENSG00000157551 | potassium voltage-gated channel subfamily J member 15 | <b>-3.45</b> | 8.01E-02 |
| <b>CCN4</b>      | ENSG00000104415 | cellular communication network factor 4               | <b>-3.44</b> | 3.10E-30 |

|                |                 |                                                       |              |          |
|----------------|-----------------|-------------------------------------------------------|--------------|----------|
| <b>ANGPTL4</b> | ENSG00000167772 | angiopoietin like 4                                   | <b>-3.44</b> | 1.90E-07 |
| <b>FREM1</b>   | ENSG00000164946 | FRAS1 related extracellular matrix 1                  | <b>-3.43</b> | 8.18E-01 |
| <b>NYNRIN</b>  | ENSG00000205978 | NYN domain and retroviral integrase containing        | <b>-3.38</b> | 2.55E-02 |
| <b>TINAGL1</b> | ENSG00000142910 | tubulointerstitial nephritis antigen like 1           | <b>-3.37</b> | 1.75E-03 |
| <b>SPTLC3</b>  | ENSG00000172296 | serine palmitoyltransferase long chain base subunit 3 | <b>-3.32</b> | 3.91E+00 |
| <b>TBPL2</b>   | ENSG00000182521 | TATA-box binding protein like 2                       | <b>-3.29</b> | 4.38E+02 |

**Table S5:** Significantly enriched tumor/stroma interactions detected by the CASTIN algorithm in PC-3M xenografts derived from FGFR1-KD versus control cells.

| GENE SYMBOLS                              | MEAN Tumor<br>(human) | MEAN Stroma<br>(mouse) | SD Tumor | SD Stroma | P-VALUE |
|-------------------------------------------|-----------------------|------------------------|----------|-----------|---------|
| <b>Enriched in PC-3M xenografts</b>       |                       |                        |          |           |         |
| SEMA4F (tumor) / NRP2 (stroma)            | 1.121                 | 0.987                  | 0.028    | 0.026     | 0.0001  |
| COL2A1 (tumor) / ITGA2B (stroma)          | 0.031                 | -0.644                 | 0.057    | 0.174     | 0.003   |
| VEGFC (tumor) / FLT4 (stroma)             | 1.243                 | 1.481                  | 0.122    | 0.075     | 0.009   |
| FGF23 (tumor) / FGFR3 (stroma)            | 0.101                 | -0.593                 | 0.304    | 0.080     | 0.015   |
| EFNB3 (tumor) / EPHB3 (stroma)            | 0.669                 | 0.386                  | 0.147    | 0.097     | 0.018   |
| FGF2 (tumor) / FGFR3 (stroma)             | 0.593                 | 0.360                  | 0.111    | 0.089     | 0.028   |
| CCL26 (tumor) / CCR1 (stroma)             | 1.206                 | 1.377                  | 0.112    | 0.094     | 0.032   |
| JAG2 (tumor) / NOTCH3 (stroma)            | 1.304                 | 1.427                  | 0.052    | 0.088     | 0.034   |
| DKK1 (tumor) / KREMEN1 (stroma)           | 2.290                 | 2.132                  | 0.086    | 0.106     | 0.034   |
| FGF2 (tumor) / GPC4 (stroma)              | 1.193                 | 0.965                  | 0.029    | 0.087     | 0.034   |
| EGF (tumor) / EGFR (stroma)               | 0.907                 | 0.723                  | 0.113    | 0.013     | 0.045   |
| VEGFC (tumor) / KDR (stroma)              | 1.568                 | 1.719                  | 0.055    | 0.099     | 0.048   |
| <b>Enriched in stromal (mouse) tissue</b> |                       |                        |          |           |         |
| NTN1 (stroma) / DCC (tumor)               | 0.903                 | 0.421                  | 0.104    | 0.116     | 0.0001  |
| ADAM12 (stroma) / EGF (tumor)             | 1.214                 | 0.928                  | 0.047    | 0.029     | 0.0002  |
| LAMA1 (stroma) / ITGA2 (tumor)            | 0.998                 | 0.747                  | 0.113    | 0.084     | 0.005   |
| EPHB3 (stroma) / EFNB3 (tumor)            | 0.669                 | 0.386                  | 0.147    | 0.097     | 0.018   |
| TNFSF10 (stroma) / TNFRSF10C (tumor)      | 0.509                 | 0.182                  | 0.042    | 0.195     | 0.018   |
| INHBA (stroma) / ACVR1B (tumor)           | 1.311                 | 1.552                  | 0.090    | 0.092     | 0.018   |

Stroma: corresponds to reads matched to the mouse genome (= mouse stromal cells in xenografts)  
Tumour: corresponds to reads matched to human genome (= PC3M cells in xenografts)

**Table S6:** The sequencing coverage and quality statistics of next generation sequencing (NGS) data for PC3M control and FGFR1 knock down cell line and xenografts.

| Sample set*                            | Sample ID                              | RNA integrity number (RIN) | Total number of sequenced reads | Total number of uniquely mapped reads | Ratio of all reads aligned to rRNA regions to total uniquely mapped reads (rRNA rate) [%] | Ratio of exon-mapped reads to total uniquely mapped reads (Expression Profile Efficiency) [%] | Total number of detected transcripts with reads $\geq 1$ | Reference genome |
|----------------------------------------|----------------------------------------|----------------------------|---------------------------------|---------------------------------------|-------------------------------------------------------------------------------------------|-----------------------------------------------------------------------------------------------|----------------------------------------------------------|------------------|
| I                                      | 21_492_ctrl_sh5 (PC3M control clone 5) | 9.5                        | 9771694                         | 8214742                               | 0.2                                                                                       | 33.5                                                                                          | 25375                                                    | GRCh38.81        |
| I                                      | 22_493_ctrl_sh5 (PC3M control clone 5) | 10                         | 7335684                         | 6153615                               | 0.3                                                                                       | 33.9                                                                                          | 23575                                                    | GRCh38.81        |
| I                                      | 23_609_ctrl_sh8 (PC3M control clone 8) | 10                         | 14943012                        | 12643362                              | 0.1                                                                                       | 32.9                                                                                          | 27798                                                    | GRCh38.81        |
| I                                      | 24_610_ctrl_sh8 (PC3M control clone 8) | 10                         | 14578922                        | 12418712                              | 0.1                                                                                       | 32.9                                                                                          | 27909                                                    | GRCh38.81        |
| I                                      | 33_615_FGFR5sh11 (PC3M KD clone 11)    | 10                         | 8407203                         | 7164026                               | 0.1                                                                                       | 32.8                                                                                          | 21871                                                    | GRCh38.81        |
| I                                      | 34_616_FGFR5sh11 (PC3M KD clone 11)    | 10.0                       | 9660825                         | 8216287                               | 0.1                                                                                       | 32.7                                                                                          | 23394                                                    | GRCh38.81        |
| II                                     | T1-5 (PC3M xenograft control)          | 9.4                        | 23608595                        | 16479360                              | 2.1                                                                                       | 78.0                                                                                          | 34155                                                    | hg19             |
| II                                     | T1-6 (PC3M xenograft control)          | 9.7                        | 36899072                        | 26794663                              | 1.9                                                                                       | 78.8                                                                                          | 34583                                                    | hg19             |
| II                                     | T2-1 (PC3M xenograft control)          | 9.5                        | 26237705                        | 19159521                              | 2.1                                                                                       | 80.2                                                                                          | 34295                                                    | hg19             |
| II                                     | T2-3 (PC3M xenograft control)          | 9.6                        | 48997888                        | 35939600                              | 1.8                                                                                       | 79.0                                                                                          | 34182                                                    | hg19             |
| II                                     | T2-4 (PC3M xenograft control)          | 9.9                        | 40784423                        | 29528974                              | 1.6                                                                                       | 78.0                                                                                          | 35128                                                    | hg19             |
| II                                     | T5-2 (PC3M KD xenograft)               | 9.5                        | 21535877                        | 14669665                              | 1.6                                                                                       | 78.1                                                                                          | 35168                                                    | hg19             |
| II                                     | T5-5 (PC3M KD xenograft)               | 9.7                        | 37293152                        | 26795537                              | 1.9                                                                                       | 77.3                                                                                          | 34614                                                    | hg19             |
| II                                     | T6-1 (PC3M KD xenograft)               | 8.7                        | 19846462                        | 10891409                              | 3.8                                                                                       | 75.4                                                                                          | 34222                                                    | hg19             |
| II                                     | T6-4 (PC3M KD xenograft)               | 9.5                        | 27343702                        | 19357981                              | 1.7                                                                                       | 77.1                                                                                          | 35757                                                    | hg19             |
| II                                     | T6-5 (PC3M KD xenograft)               | 9.8                        | 22550288                        | 16665003                              | 1.5                                                                                       | 79.0                                                                                          | 35130                                                    | hg19             |
| *Set I, cell lines; Set II, xenografts |                                        |                            |                                 |                                       |                                                                                           |                                                                                               |                                                          |                  |
